# Supplementary material for: Self-assembling peptides cross-linked with genipin: resilient hydrogels and self-standing electrospun scaffolds for tissue engineering applications
Source: Royal Society of Chemistry journal article supplement (doi:10.1039/c8bm00825f), 2018-11-19
Supplement: c8bm00825f1.pdf [file c8bm00825f1.pdf]

**Electronic Supplementary Material**

**Self-assembling peptides cross-linked with Genipin: resilient hydrogels  
and self-standing electrospun scaffolds for tissue engineering applications**

Raffaele Pugliese<sup>a,b</sup>, Mahboubeh Maleki<sup>a</sup>, Ronald N. Zuckermann<sup>c</sup> and Fabrizio Gelain<sup>a,b,\*</sup>

<sup>a</sup>IRCSS Casa Sollievo della Sofferenza, Unità di Ingegneria Tissutale, Viale Cappuccini 1, San Giovanni Rotondo (FG) 71013, Italy

<sup>b</sup>Center for Nanomedicine and Tissue Engineering (CNTE), ASST Grande Ospedale Metropolitano Niguarda, Piazza dell'Ospedale Maggiore 3, Milan 20162, Italy

<sup>c</sup>The Molecular Foundry, Lawrence Berkeley National Laboratory, 1 Cyclotron road, Berkeley, California 94720, United States

## Experiment

### Cell Morphology, Viability and Differentiation Assays

hNSCs were differentiated with basal medium (without growth factors) supplemented with bFGF (10 ng mL<sup>-1</sup>). After 2h of incubation with basal medium supplemented with bFGF, different genipin concentrations (21mM, 42mM and 64mM) were added to the cells previously seeded on Cultrex or FAQ(LDLK)<sub>3</sub> hydrogel and incubated overnight at 37°C. The day after, LIVE/DEAD assay (Thermofisher scientific) was used to evaluate cell viability. Live cells were stained with green-fluorescent calcein-AM, whereas dead cells were identified by red-fluorescent ethidium homodimer-1. Cell Nuclei were stained with Hoechst (1:1000, Invitrogen).

To assess hNSCs morphology and differentiation on electrospun mats made of cross-linked SAPs, hNSCs were differentiated with basal medium (without growth factors) supplemented with bFGF (10 ng mL<sup>-1</sup>). At 2DIV, bFGF medium was replaced with basal medium supplemented with Leukemia Inhibitory Factor (LIF, 20 ng mL<sup>-1</sup>; Chemicon) and Brain Derived Neurotrophic Factor (BDNF, 20 ng mL<sup>-1</sup>; Peprotech). Fresh medium was added every 3 days. After 7DIV, cells were fixed with 4% paraformaldehyde, then samples were washed with DPBS, permeabilized with 0.3% Triton X-100 and blocked with 10% NGS.

For immunofluorescence tests the following antibodies were used: rabbit anti-GFAP (1:500, DakoCytomation), mouse anti-βIII Tubulin (1:500, Covance), mouse anti-GalC (1:200, Chemicon), mouse anti-O4 (1:200, Chemicon), goat anti-mouse Alexa 488 (1:1000, Molecular Probes) and goat anti-rabbit Cy3 (1:1000, Jackson ImmunoResearch). Cell nuclei were stained with DAPI (1:500, Molecular probes). Fluorescence images were obtained using Zeiss microscope ApoTome System and processed with ImageJ software. For both viability and differentiation assay three independent experiments were performed.

| Full name                                                  | Abbreviation                     |
|------------------------------------------------------------|----------------------------------|
| Genipin                                                    | gp                               |
| NH <sub>2</sub> -FAQRVPPGGGLDLKLDLKLKDLK-CONH <sub>2</sub> | FAQ(LDLK) <sub>3</sub>           |
| Peptide cross-linked with genipin                          | FAQ(LDLK) <sub>3</sub> /gp       |
| Diffusive cross-linking reaction                           | DCR                              |
| <i>In situ</i> cross-linking reaction                      | ISCR                             |
| <i>In situ</i> partial cross-linking reaction              | ISPCR                            |
| Peptide cross-linked with genipin using DCR                | DCR-FAQ(LDLK) <sub>3</sub> /gp   |
| Peptide cross-linked with genipin using ISCR               | ISCR-FAQ(LDLK) <sub>3</sub> /gp  |
| Peptide cross-linked with genipin using ISPCR              | ISPCR-FAQ(LDLK) <sub>3</sub> /gp |
| Electrospun cross-linked nanofibers                        | es- FAQ(LDLK) <sub>3</sub> /gp   |

**Table S1.** Full name and abbreviation of all cross-linking strategy described in the main manuscript.

**a DCR (5% w/v)**

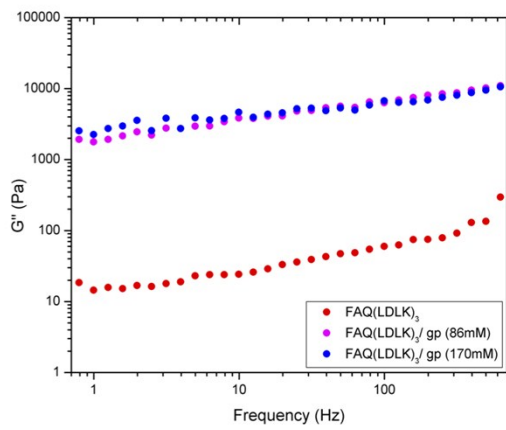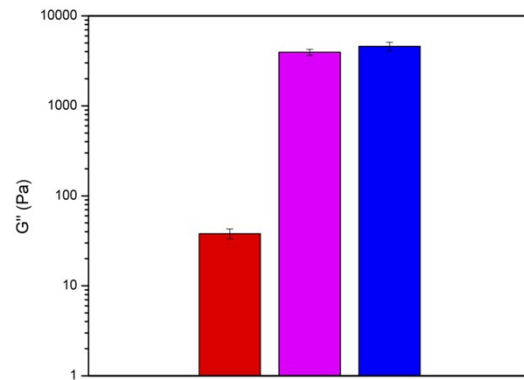

**b ISCR (5% w/v)**

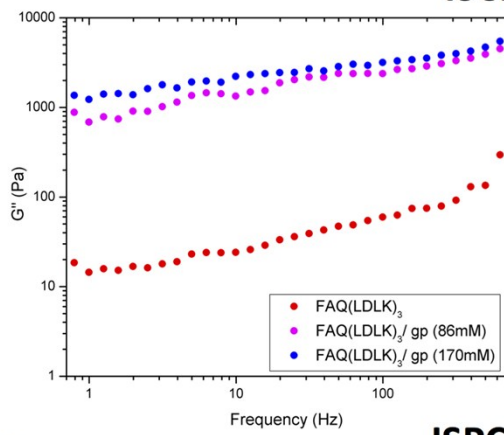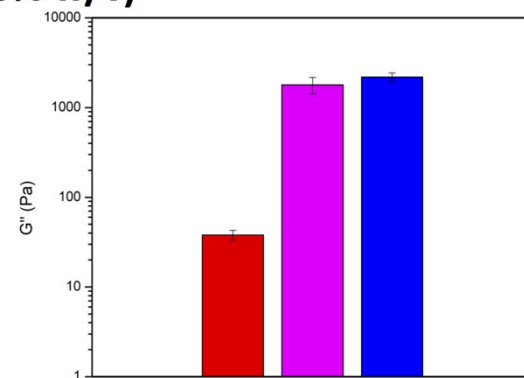

**c ISPCR (1% w/v)**

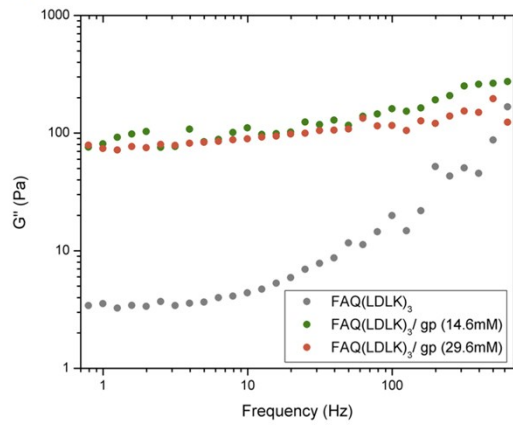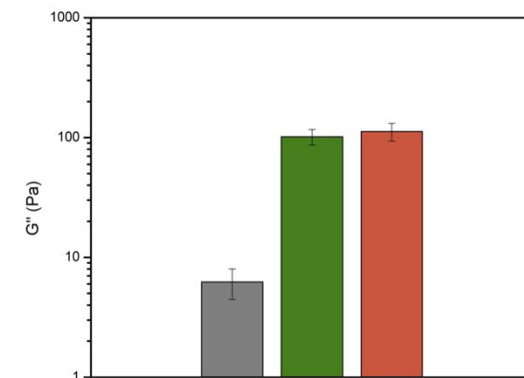

**Figure S1.** Loss modulus ( $G''$ ) profiles of FAQ(LDLK)<sub>3</sub>, (a) DCR-, (b) ISCR-, (c) ISPCR-FAQ(LDLK)<sub>3</sub>/gp peptides, and their average values in the 0.1-1,000 Hz range.

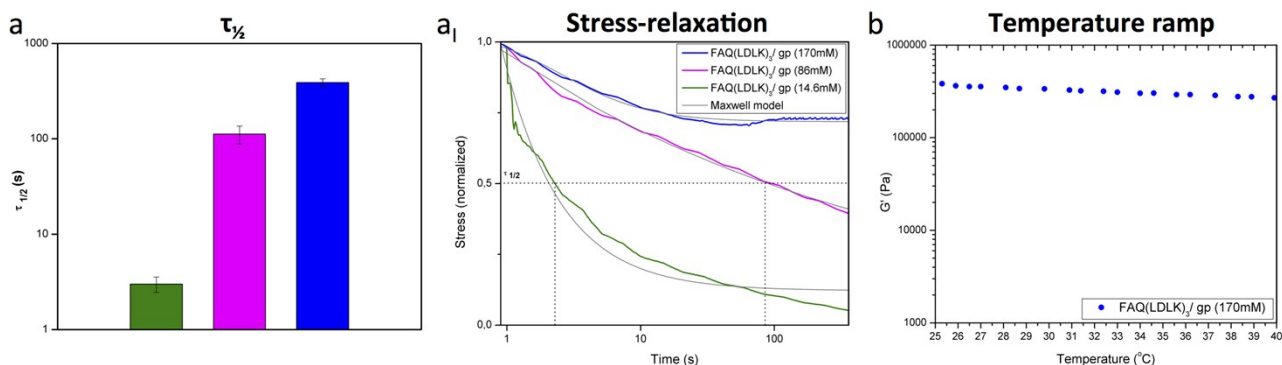

**Figure S2.** Stress-relaxation tests on DCR- FAQ(LDLK)<sub>3</sub>/gp. (a)  $\tau_{1/2}$  values of FAQ(LDLK)<sub>3</sub>/gp 170mM (blue), FAQ(LDLK)<sub>3</sub>/gp 86mM (magenta), and FAQ(LDLK)<sub>3</sub>/gp 14.6mM (green). (a<sub>1</sub>) Stress-relaxation profiles of FAQ(LDLK)<sub>3</sub>/gp (170mM), FAQ(LDLK)<sub>3</sub>/gp (86mM), and FAQ(LDLK)<sub>3</sub>/gp (14.6mM). Grey lines represent the fitting of stress-relaxation data to two-element Maxwell-Weichert linear viscoelastic model. (b) Temperature ramp of FAQ(LDLK)<sub>3</sub>/gp (170mM) as a function of  $G'$  ( $T_{\text{rate}}=5^{\circ}\text{C}/\text{min}$ , 1% strain,  $\omega=1\text{Hz}$ ).

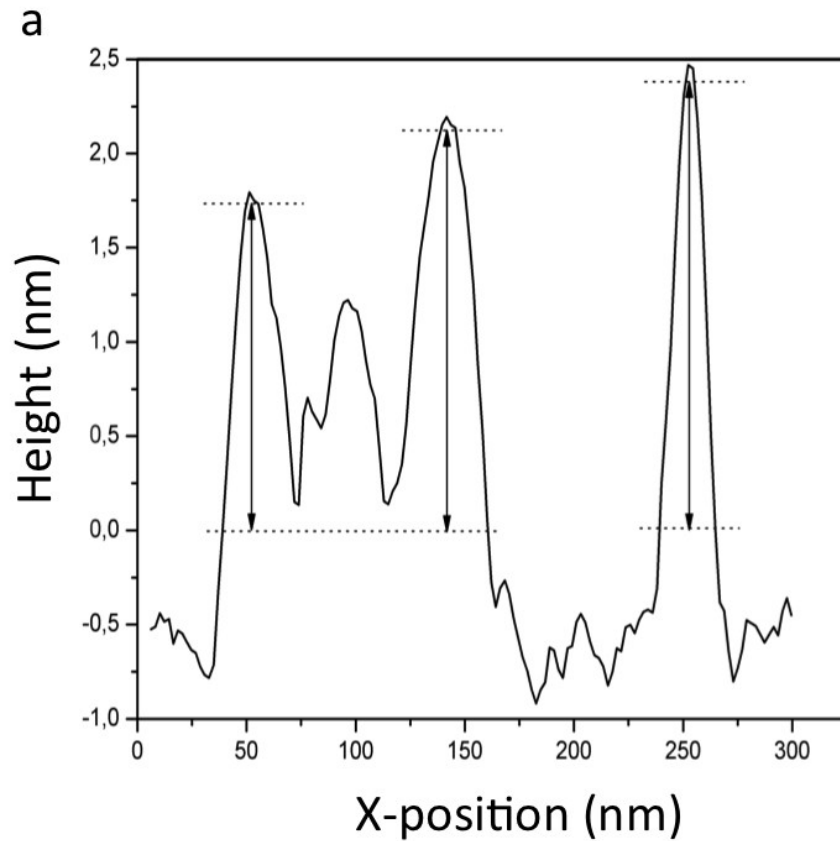

**Figure S3.** (a) Heights of FAQ(LDLK)<sub>3</sub>/gp nanofibers obtained from AFM analysis.

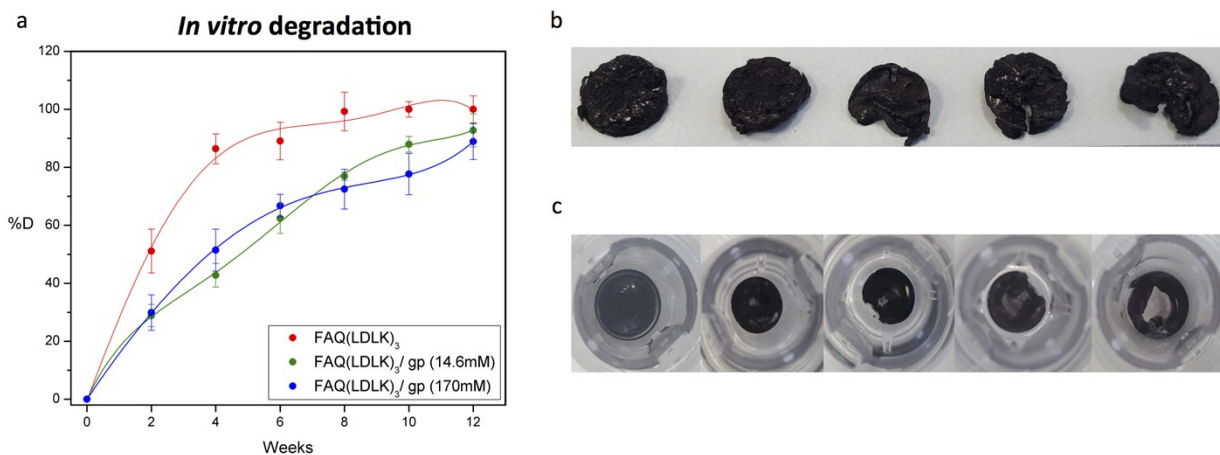

**Figure S4.** (a) Enzymatic (trypsin) degradation tests of FAQ(LDLK)<sub>3</sub> (red), FAQ(LDLK)<sub>3</sub>/gp 170mM (blue) and FAQ(LDLK)<sub>3</sub>/gp 14.6mM (green), at pH 7.4 and 37°C. (b) Macroscopic changes of FAQ(LDLK)<sub>3</sub>/gp 170mM and FAQ(LDLK)<sub>3</sub>/gp 14.6mM (c) scaffolds in the presence of trypsin observed during the 12 weeks.

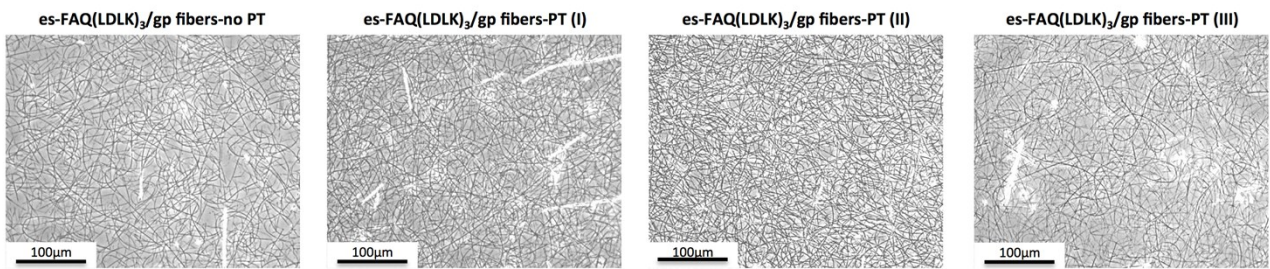

**Figure S5.** Optical images of es-FAQ(LDLK)<sub>3</sub>/gp fibers before (no PT) and after different steps of post treatments (PT(I), PT (II), PT (III) see methods for details).

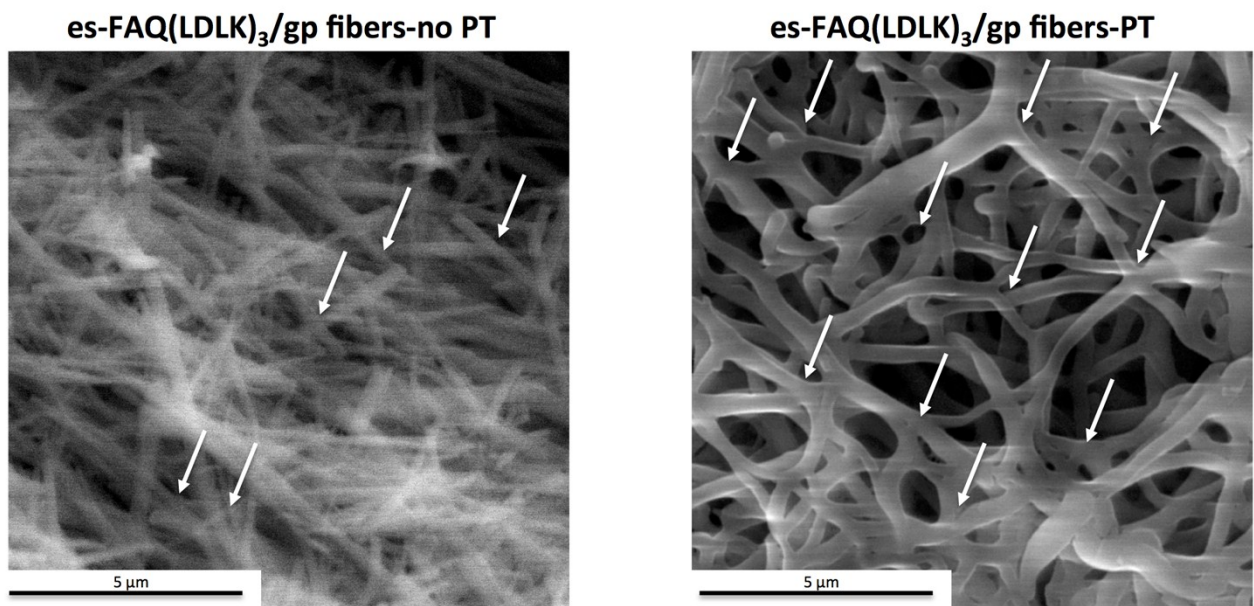

**Figure S6.** SEM images of es-FAQ(LDLK)<sub>3</sub>/gp fibers before (no PT) and after post treatment (PT). White arrows point at junctions between adjacent fibers: a significant number of links is observed for es-FAQ(LDLK)<sub>3</sub>/gp-PT fibers (right) whereas the fibers are not merged in the joints of no-PT es-FAQ(LDLK)<sub>3</sub>/gp sample (left).

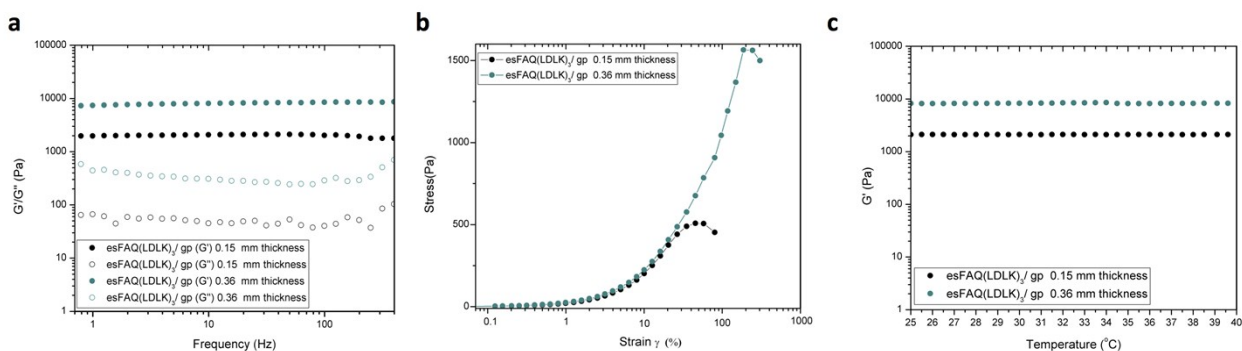

**Figure S7.** Rheological characterization of es-FAQ(LDLK)<sub>3</sub>/gp nanofibrous mats with thickness of 0.185 mm (black dots) and 0.36 mm (cyan dots). (a) Trends of G' and G'' by frequency sweep tests (0.1-1,000 Hz). (b) In stress-failure tests, the es-FAQ(LDLK)<sub>3</sub>/gp with thickness of 0.36 mm showed a substantial failure stress increase compared with es-FAQ(LDLK)<sub>3</sub>/gp with thickness of 0.185 mm, probably thanks to the greater number of covalent interactions due to the increased mat thickness. c) Temperature ramp of G' in the 25-40°C range (T<sub>rate</sub>= 5°C/min, 1% strain, ω= 1Hz).

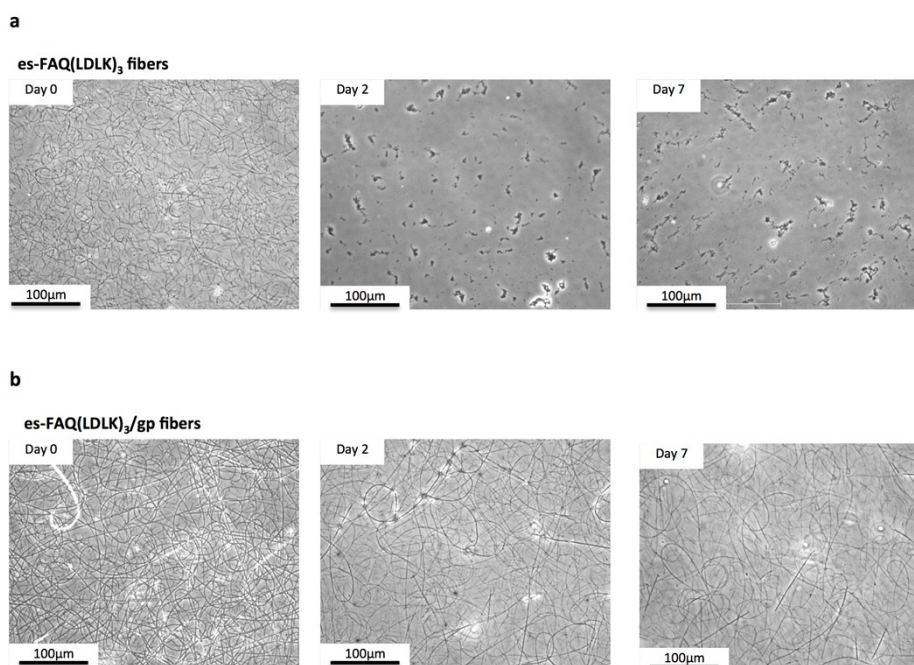

**Figure S8.** (a) Optical images of uncross-linked es-FAQ(LDLK)<sub>3</sub> and (b) cross-linked es-FAQ(LDLK)<sub>3</sub>/gp fibers at dry conditions (Day 0) and upon exposure to PBS at 37°C (Day 2-7).



Contrarily to uncross-linked es-FAQ(LDLK)<sub>3</sub>, electrospun fibers of FAQ(LDLK)<sub>3</sub>/gp are stable in wet state over time, allowing for their long-term use.

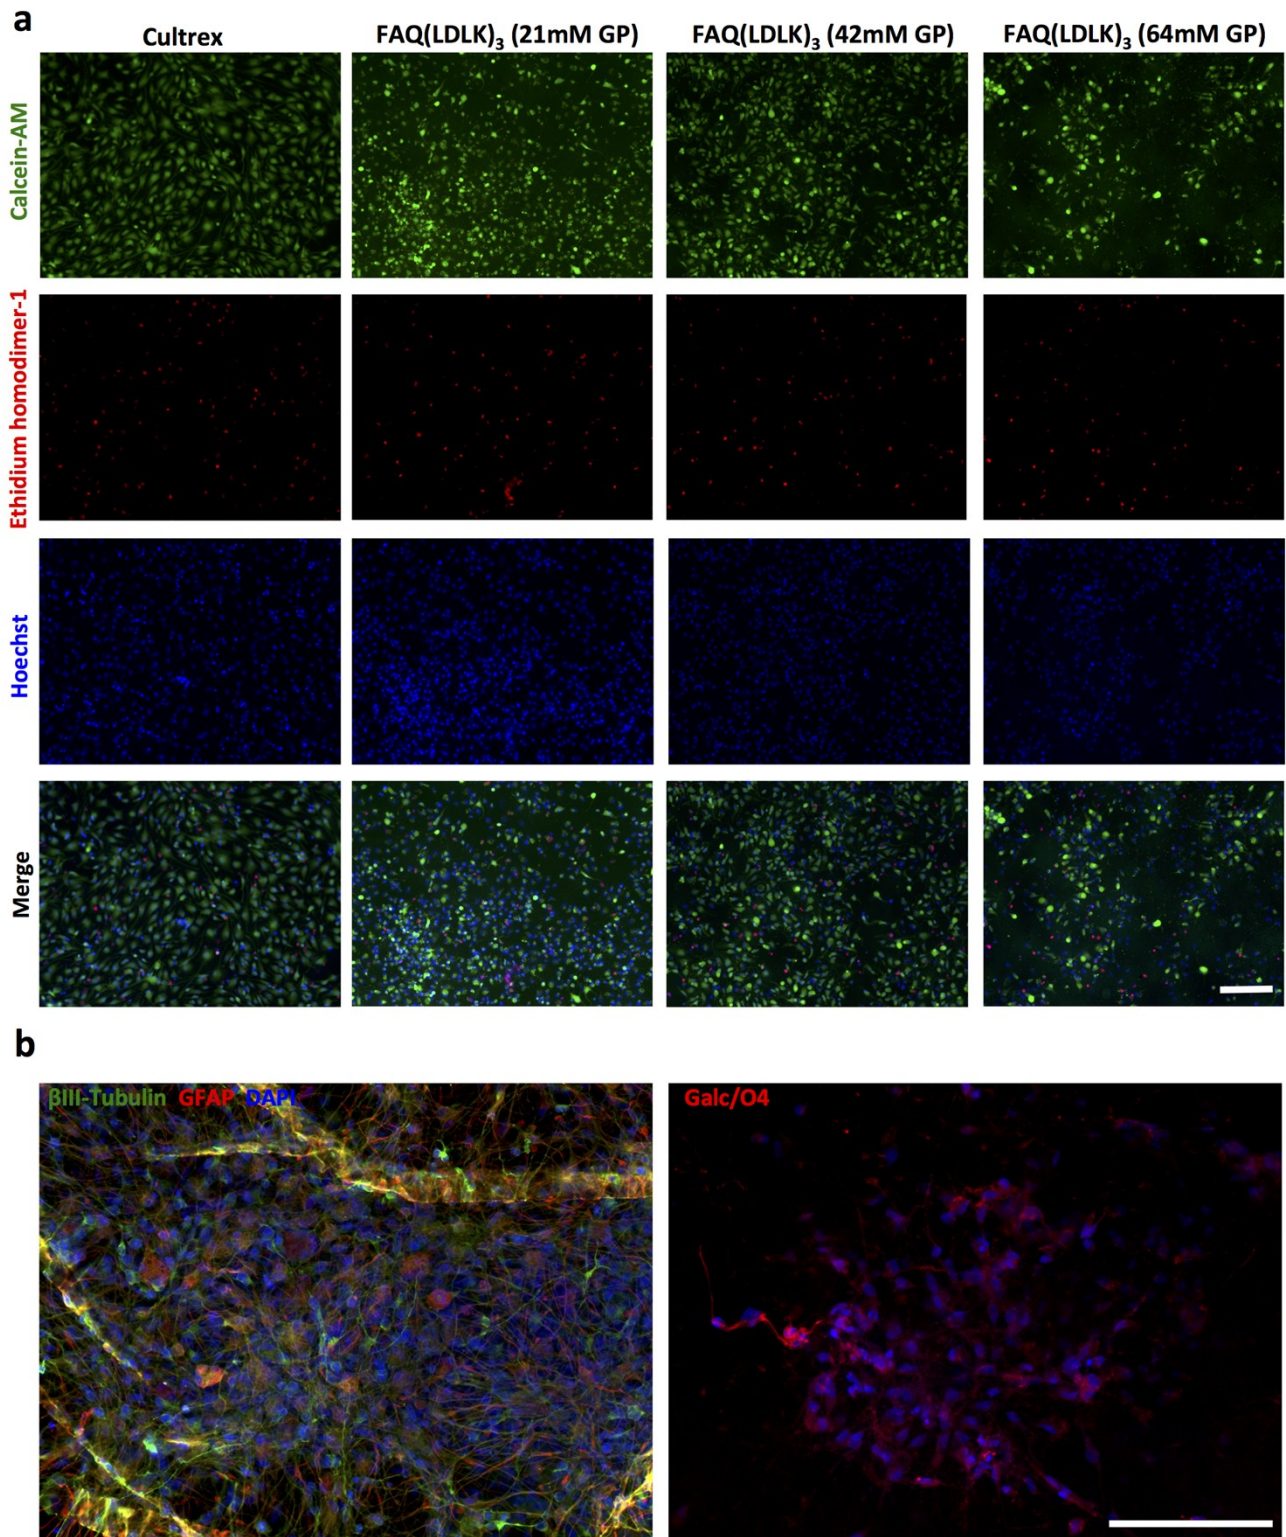

**Figure S9.** (a) Representative images of LIVE/DEAD assay on hNSC cells. Fluorescence staining of viable cells (green) and dead cells (red); Hoechst staining (blue) to highlight the nuclei. (b) Fluorescent micrographs of hNSC differentiated progeny on cross-linked electrospun FAQ(LDLK)<sub>3</sub>/gp nanofibrous mats at 7DIV. Cells were stained for  $\beta$ III-Tubulin

marker (neurons) in green, GFAP (astrocytes) in red and Galc/O4 (oligodendrocytes) in red. Cell nuclei were stained with DAPI. Scale bar in all images are 100  $\mu\text{m}$ .
